# Supplementary material for: Protein-engineered hydrogels enhance the survival of induced pluripotent stem cell-derived endothelial cells for treatment of peripheral arterial disease
Source: Royal Society of Chemistry journal article supplement (doi:10.1039/c7bm00883j), 2018-01-01
Supplement: c7bm00883j1.pdf [file c7bm00883j1.pdf]

Electronic Supplementary Information (ESI) for:

**Protein-engineered hydrogels enhance the survival of induced pluripotent stem cell-derived endothelial cells for treatment of peripheral arterial disease**

Abbygail A. Foster,<sup>a,b</sup> Ruby E. Dewi,<sup>a</sup> Lei Cai,<sup>a</sup> Luqia Hou,<sup>b,c</sup> Zachary Strassberg,<sup>c</sup>  
Cynthia Alcazar,<sup>c</sup> Sarah C. Heilshorn,<sup>a,b</sup> Ngan F. Huang<sup>\*b,c,d</sup>

\* Corresponding author

<sup>a</sup>Department of Materials Science and Engineering, Stanford University, Stanford, CA, USA

<sup>b</sup>Stanford Cardiovascular Institute, Stanford University, Stanford, CA, USA

<sup>c</sup>Veterans Affairs Palo Alto Health Care System, Palo Alto, CA, USA

<sup>d</sup>Department of Cardiothoracic Surgery, Stanford, CA, USA

E-mail: ngantina@stanford.edu (N.F. Huang).

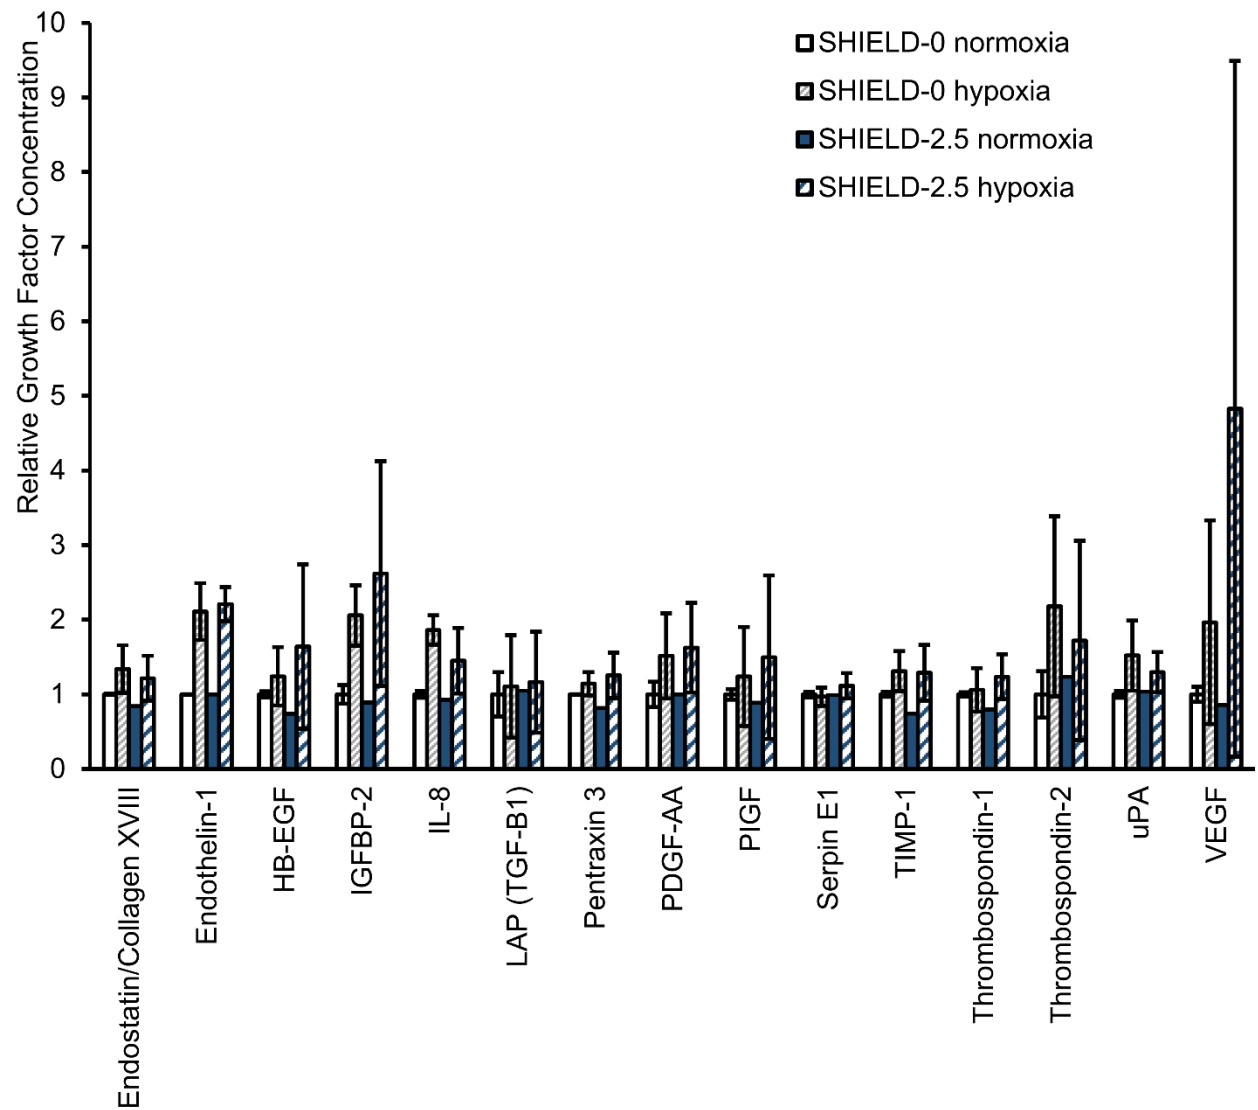

**Fig. S1** Relative growth factor concentration of collected media conditioned by iPSC-ECs within SHIELD at 4 days post-injection

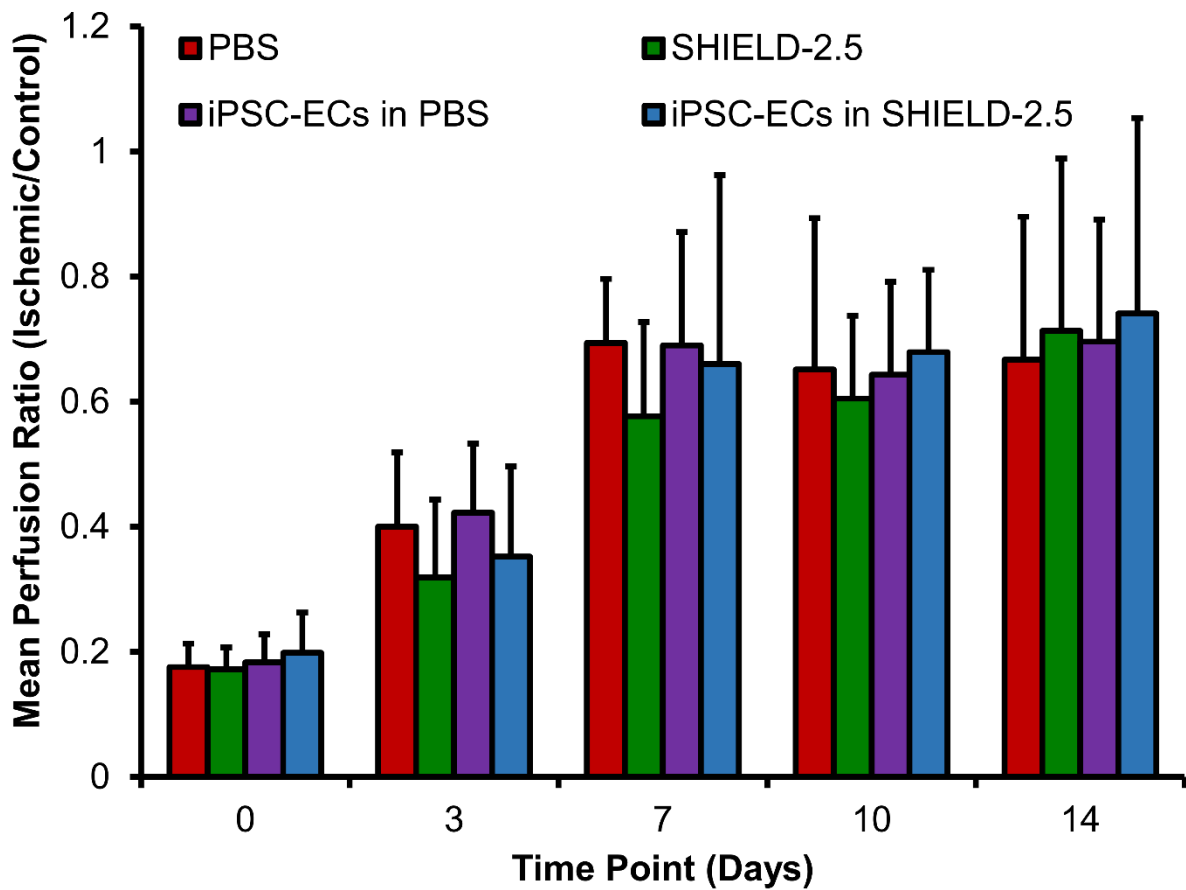

**Fig. S2** Improvement in blood perfusion in the ischemic hindlimb after hiPSC-EC transplantation. Perfusion ratio (value of the ischemic limb divided by that of the non-ischemic limb) of ischemic limbs following treatment with PBS, SHIELD-2.5, iPSC-ECs in PBS, or iPSC-ECs in SHIELD-2.5.

Hoechst/anti-GFP-AF594

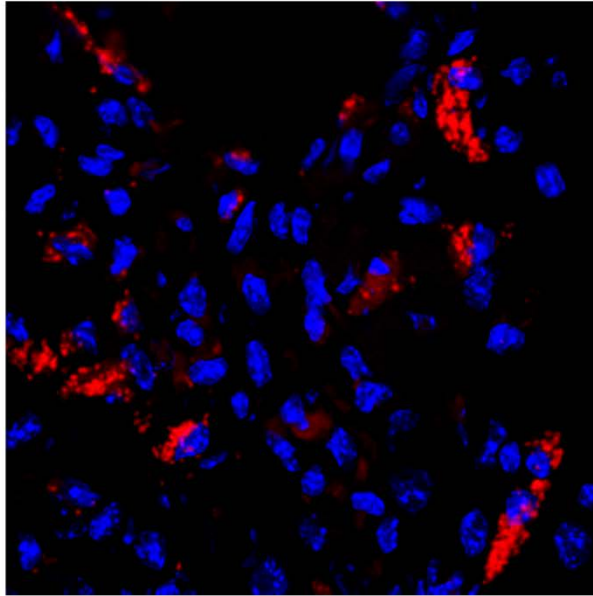

Hoechst/GFP

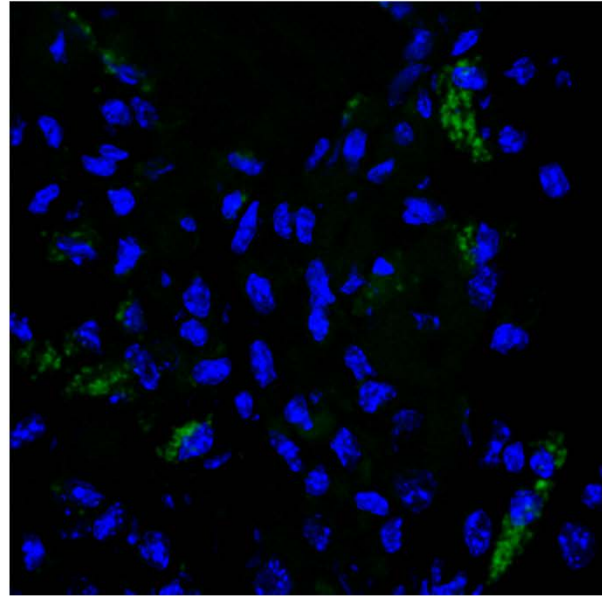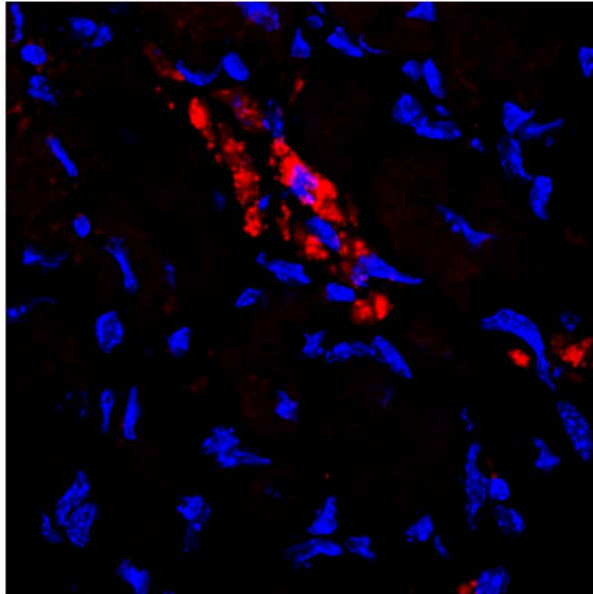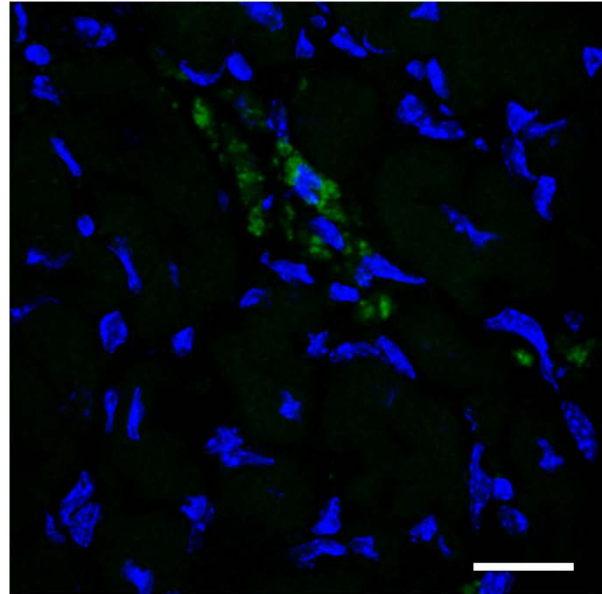

**Fig. S3** Histological analysis of iPSC-EC survival in vivo. Immunofluorescence staining of green fluorescent protein (GFP)-expressing cells by anti-GFP Alexa Fluor 594 conjugated antibody (red), Hoechst 33342 nuclear dye (blue), and endogenous GFP (green). Scale bar: 20  $\mu$ m.

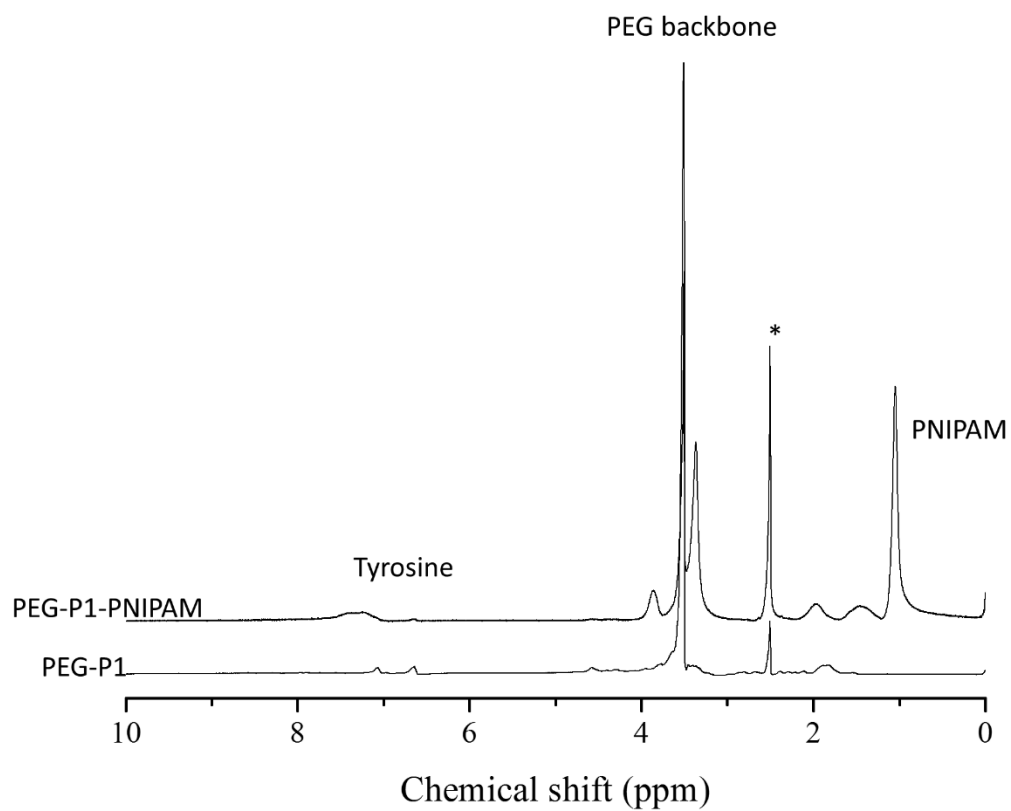

**Fig. S4** <sup>1</sup>H NMR spectra (DMSO, 500 MHz) of peptide-PEG-PNIPAM copolymers for SHIELD. \* denotes the solvent peak.

**Table S1** Amino acid sequences for the peptide and protein components of SHIELD shown using single-letter amino acid codes. The symbols for the various components correspond with the symbols used in Figure 1a. For the recombinant engineered protein C7, the WW domain is listed in blue, the cell-adhesive RGDS sequence is bold (black), and the hydrophilic spacer regions in black.

| Component | Schematic                                                                                                                                    | Amino Acid Sequence                                                                                                                                                                                                                                                                                                                                |
|-----------|----------------------------------------------------------------------------------------------------------------------------------------------|----------------------------------------------------------------------------------------------------------------------------------------------------------------------------------------------------------------------------------------------------------------------------------------------------------------------------------------------------|
| P1        |                                                             | EYPPYPPPPYPSGC                                                                                                                                                                                                                                                                                                                                     |
| C7        |  <p>Cell-adhesive ligand</p> <p>5</p> <p>CC43 WW domain</p> | MGSSHHHHHHSSGLVPRGSSSGHIDDDKVDGT[RLPAGW<br>EQRMDVKGRPYFVDHVTKSTTWEDPRPE]GTLDEL[AGAGA<br>GPEG] <sub>2</sub> <b>RGDS</b> AGPEG[AGAGAGPEG] <sub>2</sub> ELLDGT([RLPAGWEQ<br>RMDVKGRPYFVDHVTKSTTWEDPRPE]GTLDEL[AGAGAGP<br>EG] <sub>2</sub> <b>RGDS</b> AGPEG[AGAGAGPEG] <sub>2</sub> ELLDGT) <sub>5</sub> [RLPAGWEQR<br>MDVKGRPYFVDHVTKSTTWEDPRPE]GTLE |

**Table S2** Material formulation for SHIELD family of hydrogels.

| <b>Formulation</b> | <b>MW (kDa)<br/>of 8-arm PEG</b> | <b>MW (kDa)<br/>of PNIPAM</b> | <b># of PNIPAM<br/>conjugated<br/>PEG arms</b> | <b>Final wt%<br/>PNIPAM</b> |
|--------------------|----------------------------------|-------------------------------|------------------------------------------------|-----------------------------|
| SHIELD-0           | 20                               | 0                             | 0                                              | 0                           |
| SHIELD-1           | 20                               | 11                            | 1                                              | 1                           |
| SHIELD-1.25        | 20                               | 30                            | 0.5                                            | 1.25                        |
| SHIELD-2.5         | 20                               | 30                            | 1                                              | 2.5                         |
| SHIELD-4           | 20                               | 30                            | 2                                              | 4                           |
